# Supplementary material for: The Active Constituent From Gynostemma Pentaphyllum Prevents Liver Fibrosis Through Regulation of the TGF-β1/NDRG2/MAPK Axis
Source: Front Genet. 2020 Nov 4;11:594824. doi: 10.3389/fgene.2020.594824 (PMC7672159; doi:10.3389/fgene.2020.594824)
Supplement: Supplementary Table 4 — GO biological process analysis of the differentially expressed proteins. [file Table_4.XLSX]

## Sheet: Sheet1
Supplementary Table S4: GOBP analysis of the differentially expressed proteins.
GOBP ID and description	GeneRatio	q value	geneID
GO:0051186 cofactor metabolic process	0.0867209	6.1249e-11	Acnat1/Prdx6/Cyp1a2/Alas2/Alad/Gpx1/Dnmt1/Hmox1/Gstp1/Cat/Gsta3/Akr1c6/Gcdh/Gstt2/Rgn/Acsm5/Acnat2/Ido2/Flad1/Ces1d/Acsm1/Mgst1/Far1/Mpv17l/Nudt7/Glo1/Coasy/Gstk1/Hpgds/Nat8/Pdk2/Gnmt
GO:0031589 cell-substrate adhesion	0.0731707	7.76204e-09	Itga8/Myadm/Itgb5/Coro1a/Lamb1/Spp1/Fn1/Itgb2/Plg/Vcam1/Vtn/Mmp12/Fbln2/Alox15/Cd63/Itgav/Mmp14/Sirpa/Map4k4/Fbln1/Fndc3b/Flna/Fermt3/Emilin1/Parvg/Iqgap1/Enpp2
GO:0050900 leukocyte migration	0.0596206	3.09096e-06	Stk10/Coro1a/Itgam/Anxa1/Spp1/Itgb2/App/Lgals3/Plg/Il1rn/Vcam1/Mif/Mmp14/Sirpa/Abr/Ano6/Nckap1l/Emilin1/Trem2/Rtn4/Cd200r1/Stk39
GO:0015711 organic anion transport	0.0514905	7.32296e-06	Agxt/Slc1a4/Anxa1/Slc3a2/Il1rn/Mif/G6pc/Slc1a2/Ano6/Slc25a24/Slc25a1/Slc25a42/Tmem30a/Pla2g12a/Slco1b2/Slc7a8/Slc25a13/Slco1a1/Slc37a2
GO:0030198 extracellular matrix organization	0.0514905	9.07709e-06	Sh3pxd2b/Itga8/Ctss/Lamb1/Anxa2/Fn1/App/Lgals3/Serpinh1/Plg/Vtn/Mmp12/Fbln2/Mmp14/Fbln1/Aebp1/Emilin1/Mmp19/Efemp2
GO:0051346 negative regulation of hydrolase activity	0.0487805	0.000174146	Itih4/Anxa1/Gpx1/App/Serpinh1/Timp2/Vtn/Serpina7/Mcm2/Slpi/Serpina3m/Ambp/Hgf/Rgn/Ppp1r9b/Nckap1l/Amot/Naip2
GO:0051260 protein homooligomerization	0.0487805	0.000186963	Hsd17b10/Slc22a1/Aldoc/Alad/App/Hmox1/Glul/Cat/Alox5ap/Mif/Slc1a2/Evl/Clu/Rhoc/Mgst1/Emilin1/Gnmt/Ak3
GO:1901342 regulation of vasculature development	0.0433604	0.000443955	Anxa3/Anxa1/Itgb2/Dnmt1/Hmox1/Glul/Fgf2/Lgals3/Plg/Bmp7/S100a1/Hgf/Amot/Emilin1/Rtn4/Enpp2
GO:0001818 negative regulation of cytokine production	0.0433604	0.000806832	Tyrobp/Anxa1/Fn1/Hmox1/Gstp1/Sirpa/Acp5/Hgf/Fbln1/Cd84/Nckap1l/Trem2/Gpnmb/Cd200r1/Prg4/Ndrg2
GO:0070371 ERK1 and ERK2 cascade	0.0379404	0.00114106	Fn1/App/Fgf2/Gstp1/Mif/Alox15/Itgav/Sirpa/Fbln1/Emilin1/Trem2/Gpnmb/Nqo2/Ndrg2
GO:0048771 tissue remodeling	0.0352304	0.00274106	Ctss/Anxa1/Spp1/Plg/Rab3d/Itgav/Mmp14/Ctsk/Acp5/Abr/Flna/Gpnmb/Snx10
GO:0048545 response to steroid hormone	0.0352304	0.00204909	Agxt/Anxa3/Anxa1/Spp1/Bmp7/Il1rn/Hsd3b2/Hmgb2/Sult1a1/Ywhah/Hsd3b5/Lbh/Abhd2
GO:0031099 regeneration	0.0325203	0.0105725	Anxa1/Gpx1/Cdk1/Hmox1/Plg/Ccnd1/Vtn/Mif/Map4k4/Hgf/Tnc/Rtn4
GO:0010466 negative regulation of peptidase activity	0.0325203	0.00854407	Itih4/Gpx1/App/Serpinh1/Timp2/Vtn/Serpina7/Slpi/Serpina3m/Ambp/Hgf/Naip2
GO:0045444 fat cell differentiation	0.0298103	0.0181922	Sh3pxd2b/Lpl/Gpx1/Selenbp1/Ccnd1/Nucb2/Tgfb1i1/Fndc3b/Nudt7/Aldh6a1/Pex11a
GO:0002444 myeloid leukocyte mediated immunity	0.0243902	0.0244318	Anxa3/Tyrobp/Itgam/Itgb2/Hmox1/Myo1f/Cd84/Abr/Mavs
GO:0007229 integrin-mediated signaling pathway	0.0216802	0.0255131	Itga8/Tyrobp/Itgb5/Itgb2/Cd63/Itgav/Flna/Fermt3
GO:0002283 neutrophil activation involved in immune response	0.0162602	0.0266472	Anxa3/Tyrobp/Itgam/Itgb2/Myo1f/Abr
GO:0035987 endodermal cell differentiation	0.0108401	0.0321011	Fn1/Vtn/Itgav/Col12a1
GO:0070572 positive regulation of neuron projection regeneration	0.00813008	0.0393739	Mif/Hgf/Rtn4
GO:0048146 positive regulation of fibroblast proliferation	0.0135501	0.0280892	Anxa2/Fn1/Mif/Fbln1/Fndc3b
GO:0002573 myeloid leukocyte differentiation	0.0271003	0.0230572	Tyrobp/Itgam/Anxa2/App/Rbp1/C1qc/Trem2/Glo1/Snx10/Ctnnbip1
GO:0042593 glucose homeostasis	0.0298103	0.0181922	Gpx1/Vcam1/G6pc/Csrp3/Dynll1/Map4k4/Hk3/Bad/Hmgn3/Pygl/Pdk2
GO:0044774 mitotic DNA integrity checkpoint	0.0135501	0.0291982	Cdk1/Ccnd1/Top2a/Rad17/Chek2
GO:0097006 regulation of plasma lipoprotein particle levels	0.0135501	0.0302533	Anxa2/Lpl/Lmf1/Soat1/Ces1d
GO:0098581 detection of external biotic stimulus	0.00813008	0.0324518	Itgav/Trem2/Naip2
GO:0071157 negative regulation of cell cycle arrest	0.00813008	0.0324518	Ccnd1/Mif/Chek2
GO:0031664 regulation of lipopolysaccharide-mediated signaling pathway	0.00813008	0.0324518	Ly86/Mif/Cd84
GO:0045579 positive regulation of B cell differentiation	0.00813008	0.0392286	Mmp14/Bad/Nckap1l
